# Supplementary material
Source: Springer Nature journal article supplement (https://www.springermedizin.de/resource/supplementary/13019_2010_383_MOESM2_ESM.pdf/9638562)
Supplement: MOESM2 [file 9638562]

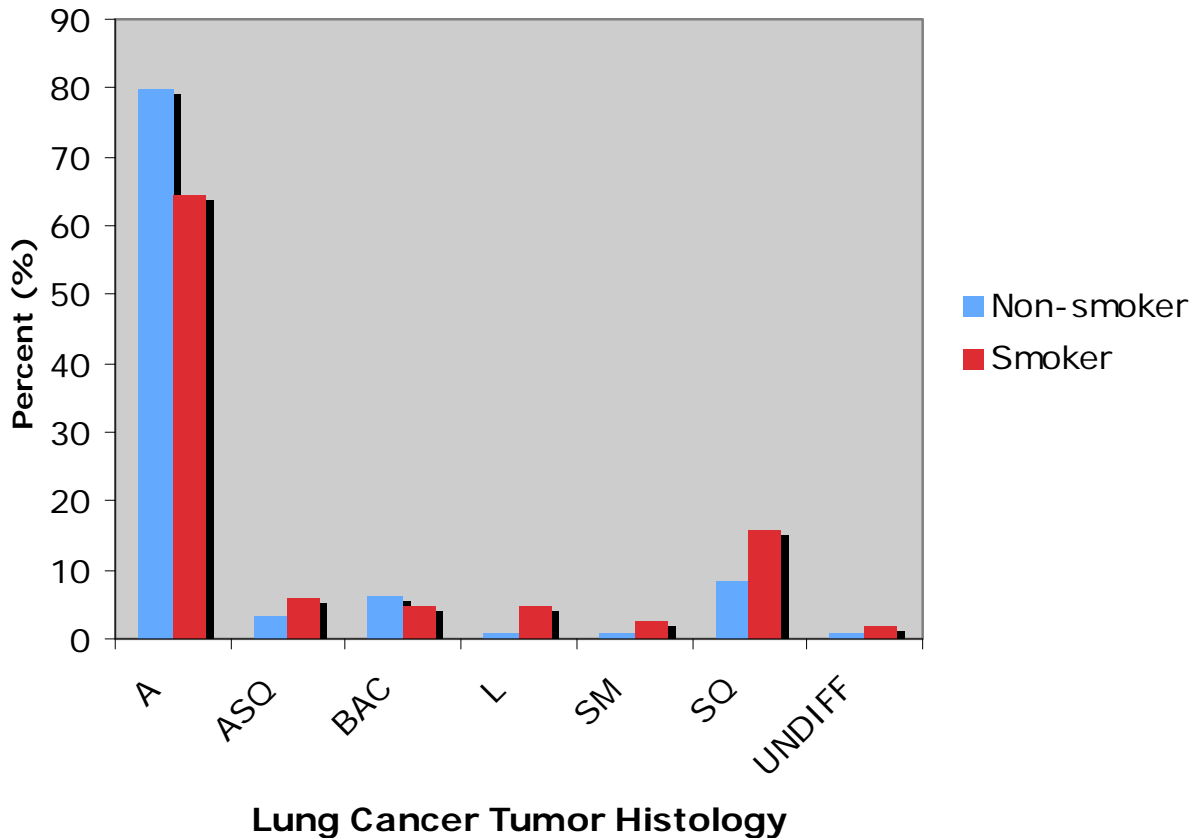

|                                           | A<br>Adenocarcinoma<br>% (number) | ASQ:<br>Adenosquamous<br>% (number) | BAC<br>Bronchoalveolar<br>% (number) | L<br>Large Cell<br>% (number) | SM<br>Small Cell<br>% (number) | SQ<br>Squamous<br>% (number) | UNDIFF<br>Undifferentiated<br>% (number) |
|-------------------------------------------|-----------------------------------|-------------------------------------|--------------------------------------|-------------------------------|--------------------------------|------------------------------|------------------------------------------|
| Never-Smoker<br>N= 144                    | 79.9 (115)                        | 3.5 (5)                             | 6.3 (9)                              | 0.7 (1)                       | 0.7 (1)                        | 8.3 (12)                     | 0.7 (1)                                  |
| Former and<br>Current<br>Smoker<br>N= 482 | 64.3 (310)                        | 6.0 (29)                            | 4.8 (23)                             | 4.8 (23)                      | 2.7 (13)                       | 15.6 (75)                    | 1.9 (9)                                  |
